# Supplementary material
Source: PubMed Central journal article supplement (PMC5322740)

## Supplementary Online Content

**eTable 1. Voice Prostheses Examined by Category**

| <b>Voice Prosthesis Type</b>                  | <b>Voice Prosthesis Category</b> |
|-----------------------------------------------|----------------------------------|
| Bivona Duckbill                               | Non-Indwelling                   |
| Bivona Ultra Low                              | Non-Indwelling                   |
| Blom-Singer Duckbill                          | Non-Indwelling                   |
| Blom-Singer Low Pressure                      | Non-Indwelling                   |
| Provox® NiD                                   | Non-Indwelling                   |
| Blom-Singer Indwelling                        | Indwelling                       |
| Blom-Singer Indwelling – Increased Resistance | Indwelling (Specialty)           |
| Blom-Singer Standard Enlarged Flange          | Indwelling (Specialty)           |
| Blom-Singer® Advantage®                       | Indwelling (Specialty)           |
| Provox® Vega                                  | Indwelling                       |
| Provox®2                                      | Indwelling                       |
| Provox® ActiValve®                            | Indwelling (Specialty)           |

**eTable 2. VP Sizes**

| <b>Variable</b> | <b>n = 3,648</b> |          |
|-----------------|------------------|----------|
|                 | <b>No.</b>       | <b>%</b> |
| VP Diameter     |                  |          |
| 16 Fr           | 358              | 9.8      |
| 17 Fr           | 135              | 3.7      |
| 20 Fr           | 2,005            | 55.0     |
| 22.5 Fr         | 1,150            | 31.5     |
| VP Length       |                  |          |
| 4 mm            | 23               | 0.6      |
| 4.5 mm          | 52               | 1.4      |
| 5 mm            | 39               | 1.1      |
| 6 mm            | 567              | 15.5     |
| 7 mm            | 23               | 0.6      |
| 8 mm            | 1,202            | 33.0     |
| 9 mm            | 20               | 0.6      |
| 10 mm           | 972              | 26.6     |
| 11 mm           | 18               | 0.5      |
| 12 mm           | 254              | 7.0      |
| 12.5 mm         | 131              | 3.6      |
| 13 mm           | 1                | 0.0      |
| 14 mm           | 144              | 4.0      |
| 15 mm           | 38               | 1.0      |
| 16 mm           | 20               | 0.6      |
| 18 mm           | 111              | 3.0      |
| 22 mm           | 23               | 0.6      |
| 25 mm           | 7                | 0.2      |
| 28 mm           | 3                | 0.1      |

**eTable 3. Device Life Stratified by VP Type**

| <b>Variable</b>                                 | <b>Median (range)</b> | <b>Mean (SD)</b> |
|-------------------------------------------------|-----------------------|------------------|
| <b>VP Type</b>                                  |                       |                  |
| Smiths Medical                                  |                       |                  |
| Bivona Duckbill                                 | 7 (1-175)             | 33 (58)          |
| Bivona Ultra Low                                | 20 (5-119)            | 31 (29)          |
| InHealth Technologies                           |                       |                  |
| Blom-Singer Duckbill                            | 18 (2-34)             | 18 (16)          |
| Blom-Singer Low Pressure                        | 33 (1-522)            | 60 (75)          |
| Blom-Singer Indwelling                          | 59 (1-816)            | 86 (87)          |
| Blom-Singer Indwelling Standard Enlarged Flange | 42 (1-469)            | 71 (83)          |
| Blom-Singer® Advantage®                         | 67 (1-760)            | 97 (112)         |
| Atos Medical                                    |                       |                  |
| Provox® NiD                                     | 47 (1-362)            | 63 (58)          |
| Provox® Vega                                    | 45 (3-138)            | 53 (32)          |
| Provox®2                                        | 77 (1-764)            | 100 (84)         |
| Provox® ActiValve®                              | 161 (7-567)           | 192 (166)        |
| <b>VP Category</b>                              |                       |                  |
| Non-Indwelling                                  | 38 (1-522)            | 59 (64)          |
| Indwelling                                      | 70 (1-816)            | 94 (86)          |
| Specialty Indwelling                            | 61 (1-760)            | 92 (98)          |
| Custom                                          | 44 (1-740)            | 70 (84)          |
| <b>Reason for removal</b>                       |                       |                  |
| Complication                                    | 28 (1-816)            | 57 (78)          |
| Leakage                                         | 64 (1-672)            | 89 (82)          |
| Other                                           | 61 (1-764)            | 92 (103)         |
| <b>Surgery</b>                                  |                       |                  |
| Total laryngectomy                              | 62 (1-816)            | 86 (85)          |
| Total laryngectomy with partial pharyngectomy   | 57 (1-672)            | 84 (88)          |
| Total laryngopharyngectomy                      | 56 (1-533)            | 96 (102)         |
| <b>Reconstruction</b>                           |                       |                  |
| Circumferential                                 | 56 (1-533)            | 96 (102)         |
| Patch                                           | 53 (1-572)            | 74 (75)          |
| None                                            | 63 (1-816)            | 89 (88)          |
| <b>Radiation</b>                                |                       |                  |
| Pre-operative                                   | 61 (1-764)            | 89 (86)          |
| Post-operative                                  | 57 (1-672)            | 80 (80)          |
| Both                                            | 49 (1-223)            | 71 (57)          |
| None                                            | 66 (1-816)            | 96 (105)         |

Abbreviations: SD, standard deviation; VP, voice prosthesis.

**eFigure. Device life stratified by reason for prosthesis removal (n=3648 voice prostheses)**

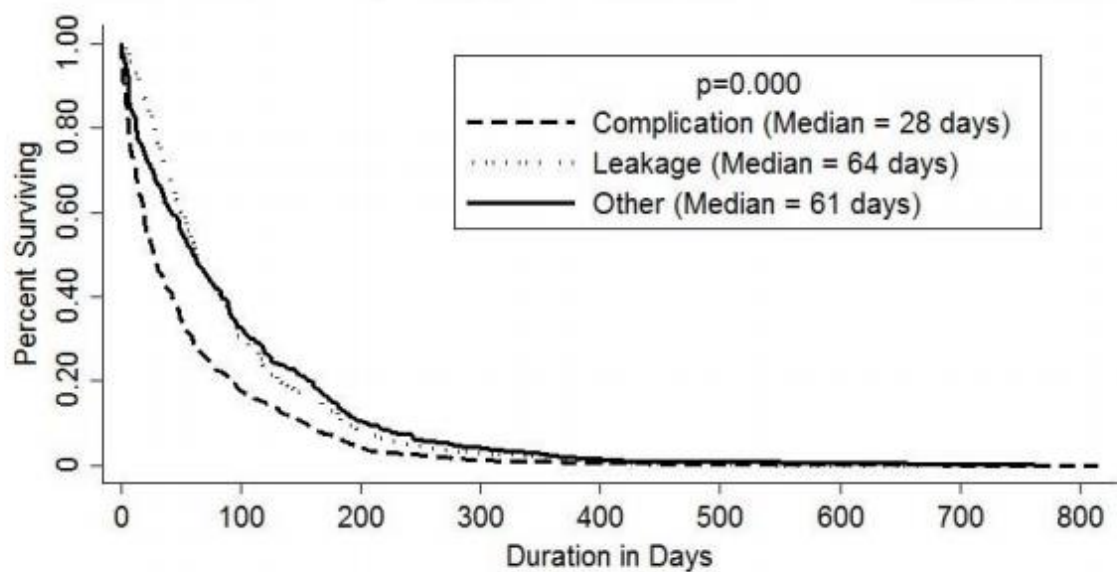

Supplement: NIHMS851266-supplement-01.pdf [file NIHMS851266-supplement-01.pdf]
